# Supplementary material
Source: PubMed Central journal article supplement (PMC3107893)
Supplement: NIHMS288209-supplement-1.pdf [file NIHMS288209-supplement-1.pdf]

## Supplementary Figure 1

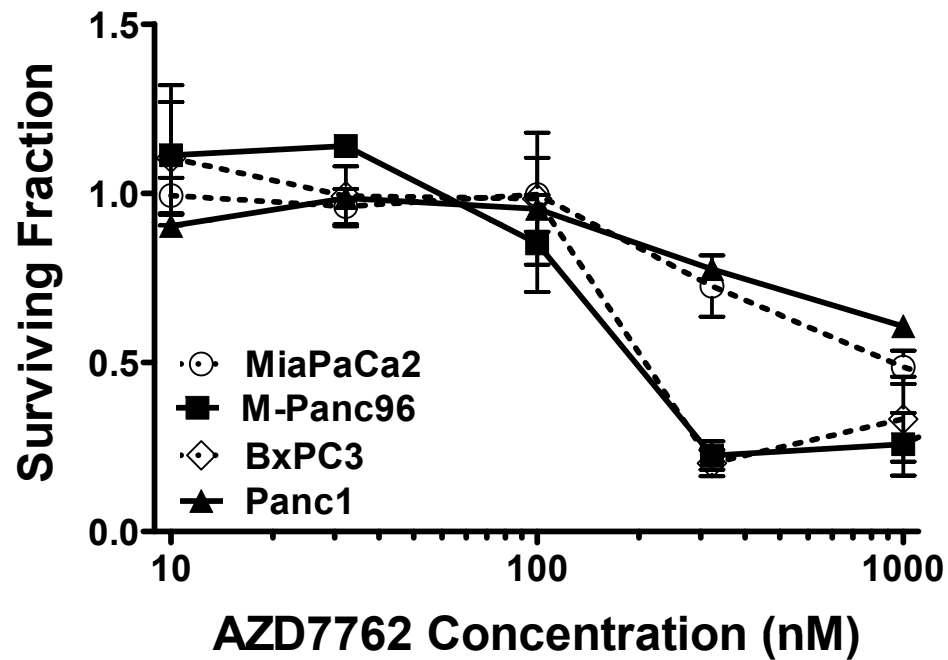

**Supplementary Figure 1. AZD7762 dose response.** The indicated pancreatic cancer cell lines were treated for 24 hours with AZD7762 and then processed for clonogenic survival. Data are the mean of 2-6 independent experiments.

## Supplementary Figure 2

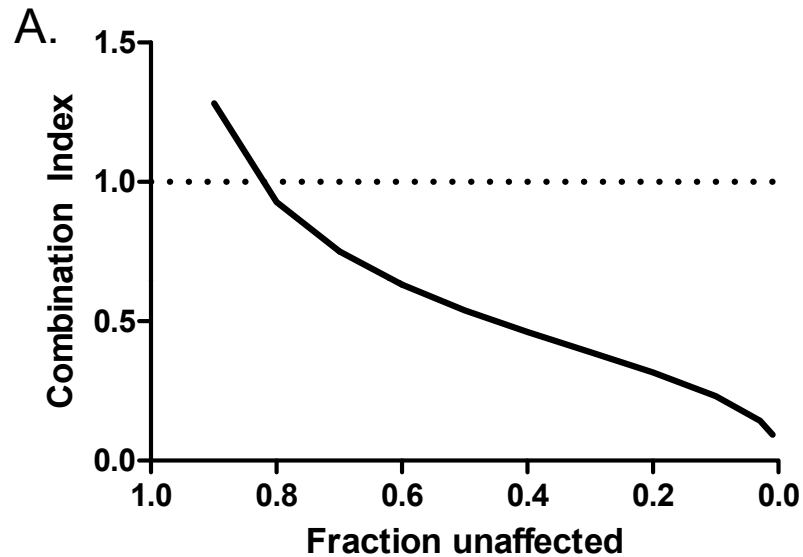

B.

### Combination indices for gemcitabine and AZD7762

| <u>Fraction unaffected</u> | <u>Combination Index</u> |
|----------------------------|--------------------------|
| 0.5                        | 0.5 ± 0.3                |
| 0.3                        | 0.2 ± 0.1*               |
| 0.1                        | 0.09 ± 0.02*             |
| 0.01                       | 0.02 ± 0.01*             |

**Supplementary Figure 2. Combination indices for gemcitabine and AZD7762.** MiaPaCa-2 cells were treated with a fixed ratio of AZD7762:gemcitabine (1:2.5) under schedule 2 at drug concentrations of 20-400nM (AZD7762) and 50-500nM (gemcitabine). Data are from a single representative experiment (A) or are the mean of 3 independent experiments ± standard error (B). A combination index less than 1 indicates synergy and statistically significant differences are indicated (\*P<0.05). Combination indices were calculated as previously described (22-23).

## Supplementary Figure 3

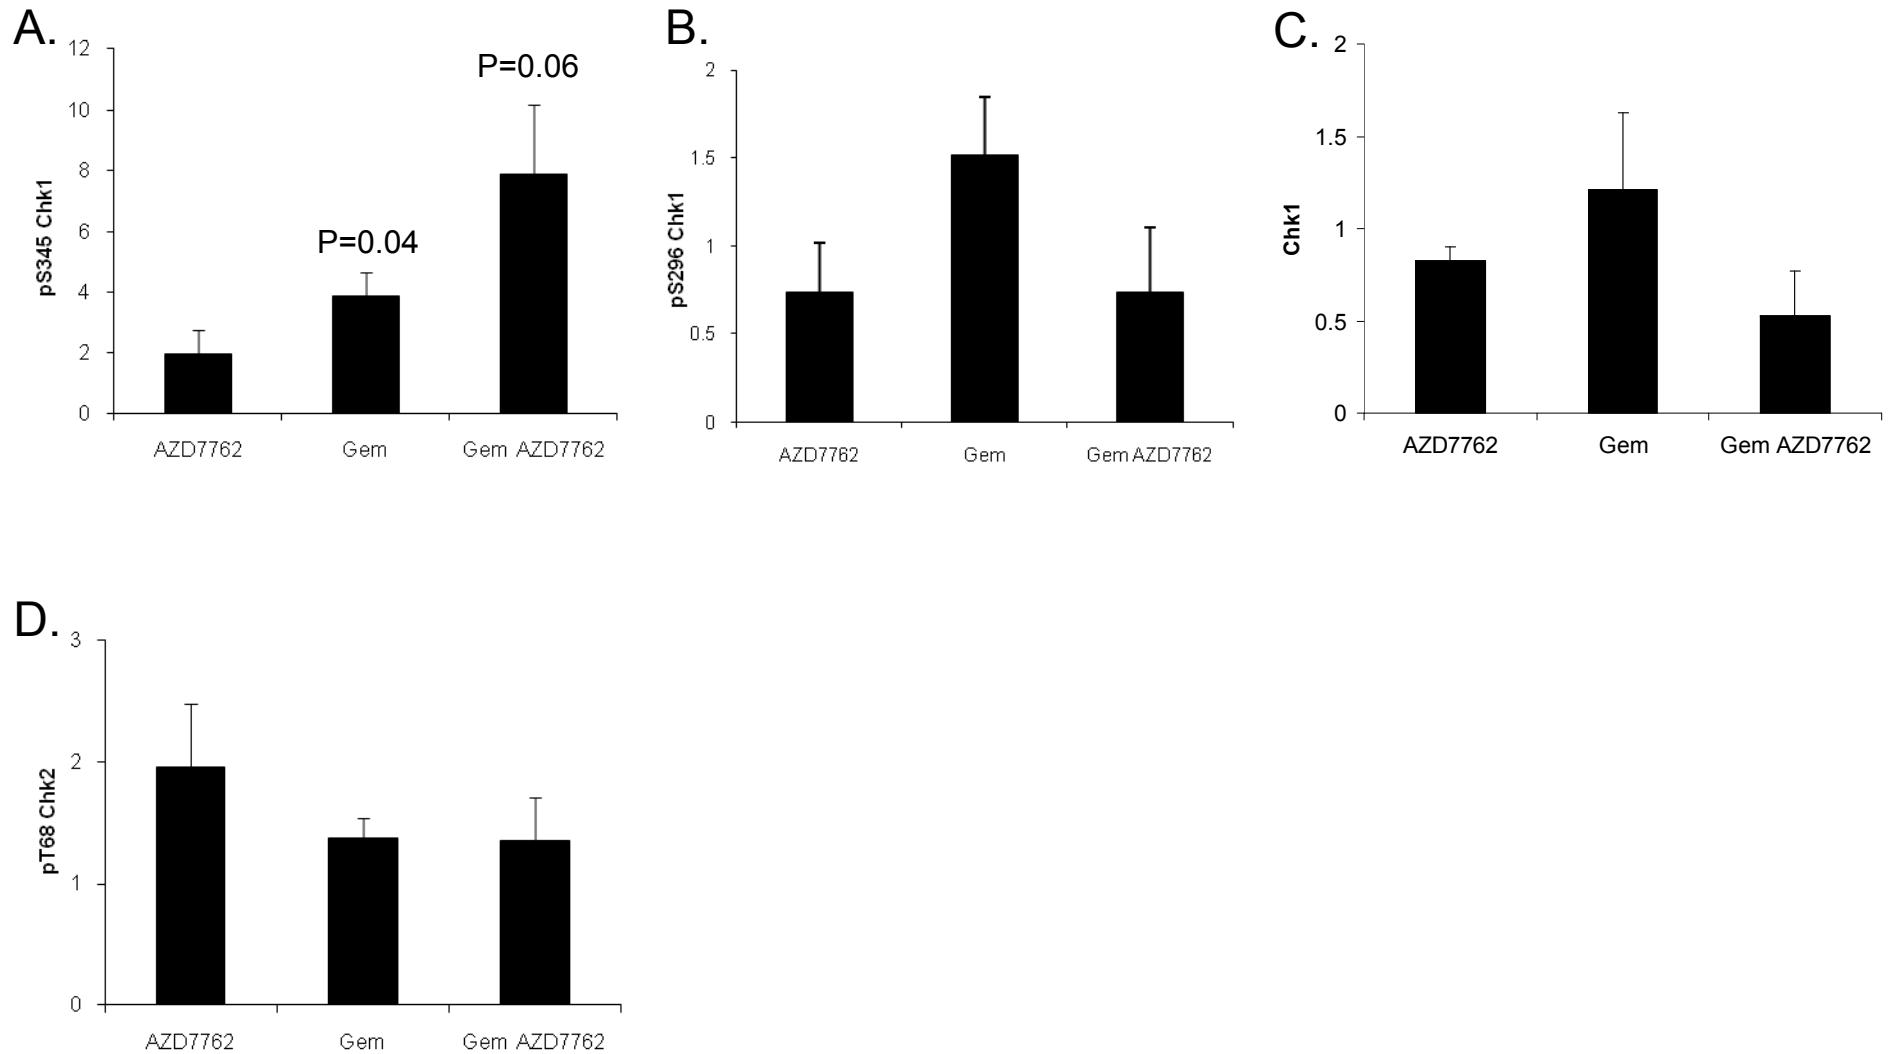

**Supplementary Figure 3. Quantification of cell cycle checkpoint proteins in MiaPaCa-2 tumors.** MiaPaCa-2 tumor immunoblots, presented in Fig. 4A were quantitated by film densitometry. Data are the mean of  $n = 3$  tumors per treatment condition. Statistically significant differences from control tumors are indicated ( $*P < 0.05$ ) and were determined by a Student's t-test.

## Supplementary Figure 4

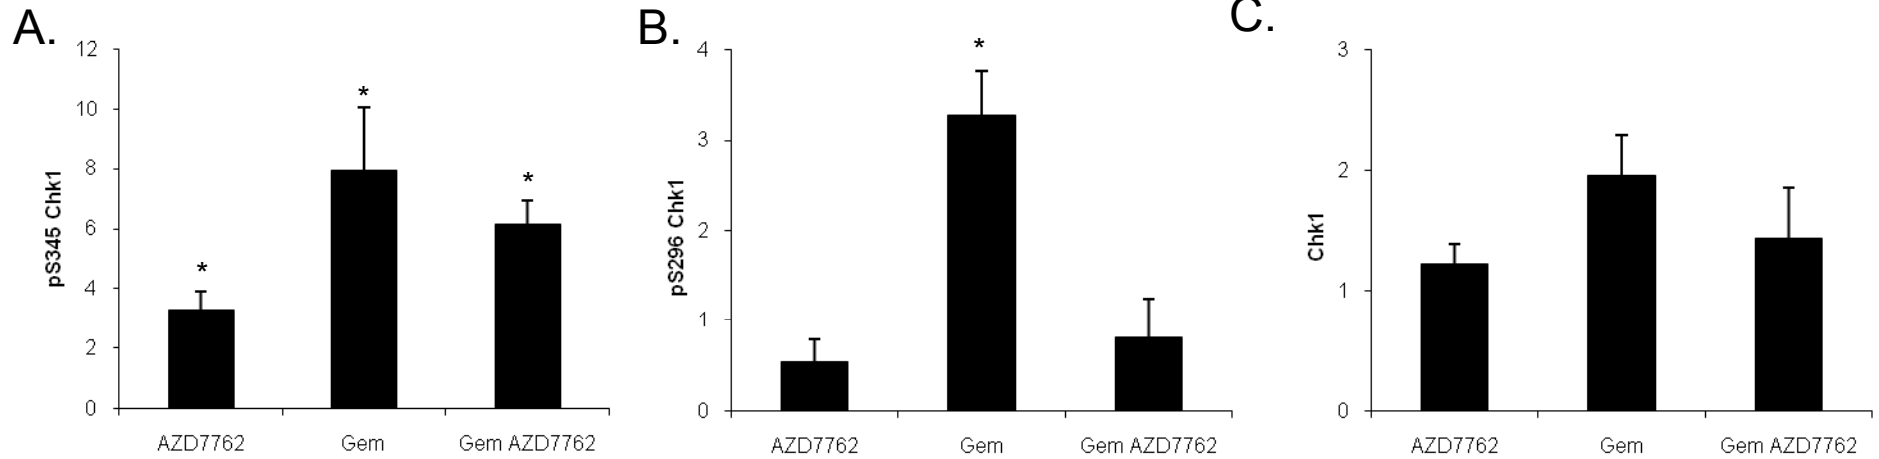

**Supplementary Figure 4. Quantification of cell cycle checkpoint proteins in Patient-J tumors.** Patient-J tumor immunoblots, presented in Fig. 4B were quantitated by film densitometry. Data are the mean of  $n = 3$  tumors per treatment condition. Statistically significant differences from control tumors are indicated (\* $P < 0.05$ ) and were determined by a Student's t-test.

## Supplementary Table 1

**Suppl. Table 1. Relative weight loss during and after therapy**

| Treatment               | Day 7     | Day 14    | Day 21    |
|-------------------------|-----------|-----------|-----------|
| <b><i>MiaPaca-2</i></b> |           |           |           |
| Control                 | 1.06±0.02 | 1.09±0.02 | 1.13±0.01 |
| Gem                     | 1.04±0.01 | 1.09±0.03 | 1.09±0.02 |
| AZD7762                 | 1.03±0.02 | 1.06±0.01 | 1.10±0.00 |
| Gem AZD7762             | 0.93±0.01 | 0.96±0.00 | 0.95±0.05 |
| <b><i>Patient-J</i></b> |           |           |           |
| Control                 | 1.00±0.02 | 1.00±0.02 | 1.05±0.02 |
| Gem                     | 1.00±0.02 | 0.95±0.02 | 0.95±0.02 |
| AZD7762                 | 0.95±0.02 | 0.95±0.03 | 0.95±0.03 |
| Gem AZD7762             | 1.00±0.02 | 0.93±0.02 | 0.93±0.02 |

Weights are relative to the first day of therapy (day 0).

## Supplementary Table 2

**Suppl. Table 2. pS345 Chk1 and  $\gamma$ -H2AX immunohistochemistry**

| Treatment               | pS345 Chk1  | $\gamma$ -H2AX |
|-------------------------|-------------|----------------|
| <b><i>MiaPaca-2</i></b> |             |                |
| Control                 | -           | -              |
| Gem                     | - / + (<2%) | -              |
| AZD7762                 | + (<5%)     | -              |
| Gem AZD7762             | ++          | ++             |
| <b><i>Patient-J</i></b> |             |                |
| Control                 | -           | -              |
| Gem                     | ++          | +++            |
| AZD7762                 | ++          | +++            |
| Gem AZD7762             | ++/+++      | +++            |

Data are an average score of 3 – 4 tumors per treatment group.

## Supplementary Figure 5

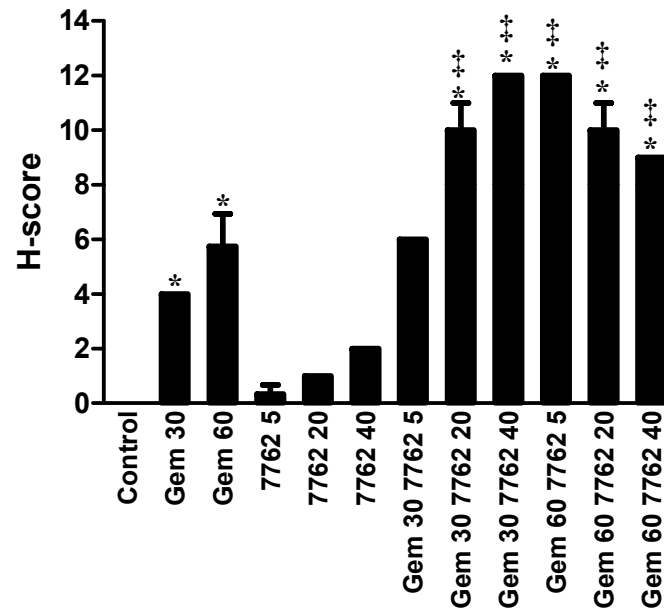

**Supplementary Figure 5. Quantification of S345 immunohistochemical staining in H460 tumor xenografts in response to gemcitabine and AZD7762.** Mice bearing H460 tumors were treated with gemcitabine (30 - 60 mg/kg) and three hours later with AZD7762 (5 - 40 mg/kg). Three hours post-AZD7762, tissues were harvested and fixed for immunohistochemistry. H-score was determined as described in materials and methods. Data are the mean of 3 tumors per condition  $\pm$  standard error. Statistically significant differences from control\* or gemcitabine‡ are indicated ( $P < 0.05$ ) and were determined by one-way ANOVA.
